# Supplementary material for: Genetic alteration of histone lysine methyltransferases and their significance in renal cell carcinoma
Source: PeerJ. 2019 Feb 6;7:e6396. doi: 10.7717/peerj.6396 (PMC6368835; doi:10.7717/peerj.6396)
Supplement: Supplemental Information 2 [file peerj-07-6396-s002.xlsx]

## Sheet: Sheet1
Supplementary Table 1
ASH1L F	ATCAGAACCAAAGAGCCCCTAA
ASH1L R	TAACTGTCAATCACCATCCCAC
NSD1 F	AAGACGAAGGAGCAGCGGTTG
NSD1 R	CGGACAGTAAGCCAGGTAGGGA
PRDM6 F	GCAAGCCCAACTTCCACA
PRDM6 R	GCAAAGGCACGACCACAG
EZH2 F	AATCAGAGTACATGCGACTGAGA
EZH2 R	GCTGTATCCTTCGCTGTTTCC
WHSC1L1 F	AACTCATTGACTCCGCCAACA
WHSC1L1 R	CTGAAAGCCTTGCTGCAAAGT
SETD2 F	TGCTTCTAGTCGATTTTTGCCC
SETD2 R	AGGGTTTGGAGTATCACTTTGC
SETD1A F	CAGTGGCGGAACTACAAGCTC
SETD1A R	CATAGCGGTACACCTTCTGAGA
SUV420H1-F	AGAAATCATTGCAAGCGGCTGGAG
SUV420H1-R	CTGGCTCCTTATCTTTTTTAATGG
