# Supplementary material for: Genetic alteration of histone lysine methyltransferases and their significance in renal cell carcinoma
Source: PeerJ. 2019 Feb 6;7:e6396. doi: 10.7717/peerj.6396 (PMC6368835; doi:10.7717/peerj.6396)
Supplement: Supplemental Information 3 — Expression of 46 HMTs and their detailed clustering analysis. [file peerj-07-6396-s003.xlsx]

## Sheet: Sheet1
		Group Statistics
	phenotype	N	Mean	Std. Deviation	Std. Error Mean
WHSC1L1	ccRCC	606	9.8013	0.4554	0.0185
	non-ccRCC	414	9.4854	0.54282	0.02668
SETD3	ccRCC	606	11.2035	0.51237	0.02081
	non-ccRCC	414	11.3655	0.60929	0.02994
SETD6	ccRCC	606	7.9256	0.4526	0.01839
	non-ccRCC	414	8.1642	0.43089	0.02118
SETDB1	ccRCC	606	9.8111	0.40506	0.01645
	non-ccRCC	414	9.4176	0.42967	0.02112
SMYD4	ccRCC	606	8.5947	0.51237	0.02081
	non-ccRCC	414	8.4702	0.58053	0.02853
EZH1	ccRCC	606	10.0602	0.47053	0.01911
	non-ccRCC	414	10.2942	0.49345	0.02425
SUV420H1	ccRCC	606	9.8031	0.36718	0.01492
	non-ccRCC	414	9.4946	0.51817	0.02547
EHMT1	ccRCC	606	9.6145	0.39332	0.01598
	non-ccRCC	414	9.8559	0.38031	0.01869
SETD2	ccRCC	606	10.2272	0.5408	0.02197
	non-ccRCC	414	10.5807	0.53419	0.02625
SUV39H2	ccRCC	606	6.7616	0.4629	0.0188
	non-ccRCC	414	6.3454	0.54919	0.02699
PRDM4	ccRCC	606	9.9054	0.43883	0.01783
	non-ccRCC	414	10.2266	0.70313	0.03456
SETDB2	ccRCC	606	8.4663	0.53072	0.02156
	non-ccRCC	414	8.7094	0.61289	0.03012
SETD1B	ccRCC	606	9.5554	0.4981	0.02023
	non-ccRCC	414	9.8485	0.57295	0.02816
EHMT2	ccRCC	606	9.9273	0.47111	0.01914
	non-ccRCC	414	10.1586	0.60742	0.02985
SETD1A	ccRCC	606	9.4914	0.47995	0.0195
	non-ccRCC	414	9.9868	0.4555	0.02239
SETD4	ccRCC	606	8.1017	0.56215	0.02284
	non-ccRCC	414	8.4754	0.61824	0.03038
PRDM2	ccRCC	606	9.5541	0.47773	0.01941
	non-ccRCC	414	9.2902	0.61844	0.03039
SETD5	ccRCC	606	10.3539	0.54007	0.02194
	non-ccRCC	414	10.3609	0.53744	0.02641
SMYD5	ccRCC	606	9.6119	0.38905	0.0158
	non-ccRCC	414	9.7841	0.4504	0.02214
KMT2A	ccRCC	0a	.	.	.
	non-ccRCC	0a	.	.	.
SETMAR	ccRCC	606	7.3669	0.81463	0.03309
	non-ccRCC	414	8.0702	1.04131	0.05118
SETD8	ccRCC	606	8.936	0.45367	0.01843
	non-ccRCC	414	9.2609	0.47511	0.02335
NSD1	ccRCC	606	10.7985	0.46674	0.01896
	non-ccRCC	414	10.3463	0.54985	0.02702
PRDM11	ccRCC	606	4.5647	0.77826	0.03161
	non-ccRCC	414	4.599	0.84948	0.04175
WHSC1	ccRCC	606	9.8489	0.47114	0.01914
	non-ccRCC	414	9.936	0.5008	0.02461
SMYD2	ccRCC	606	10.1217	0.5229	0.02124
	non-ccRCC	414	9.9802	0.65828	0.03235
PRDM15	ccRCC	606	7.1937	0.53906	0.0219
	non-ccRCC	414	7.0093	0.48549	0.02386
ASH1L	ccRCC	606	10.6813	0.64795	0.02632
	non-ccRCC	414	10.1499	0.73083	0.03592
SETD7	ccRCC	606	11.0041	0.65296	0.02652
	non-ccRCC	414	10.2101	0.72692	0.03573
SMYD3	ccRCC	606	7.6562	0.5445	0.02212
	non-ccRCC	414	7.3448	0.88949	0.04372
EZH2	ccRCC	606	6.7723	1.0227	0.04154
	non-ccRCC	414	6.519	1.0958	0.05386
PRDM10	ccRCC	606	7.6627	0.41483	0.01685
	non-ccRCC	414	7.3769	0.51057	0.02509
SUV420H2	ccRCC	606	6.3694	0.86626	0.03519
	non-ccRCC	414	7.2116	0.82936	0.04076
KMT2C	ccRCC	0a	.	.	.
	non-ccRCC	0a	.	.	.
PRDM13	ccRCC	606	0.108	0.29848	0.01212
	non-ccRCC	414	0.1592	0.58602	0.0288
DOT1L	ccRCC	606	8.8462	0.75597	0.03071
	non-ccRCC	414	9.2454	0.60667	0.02982
PRDM7	ccRCC	606	0.321	0.55343	0.02248
	non-ccRCC	414	0.5738	0.66464	0.03267
PRDM6	ccRCC	606	3.7993	1.12793	0.04582
	non-ccRCC	414	3.8706	0.93111	0.04576
KMT2E	ccRCC	0a	.	.	.
	non-ccRCC	0a	.	.	.
PRDM5	ccRCC	606	5.4145	0.87736	0.03564
	non-ccRCC	414	4.8975	1.46035	0.07177
PRDM14	ccRCC	606	0.371	0.80517	0.03271
	non-ccRCC	414	0.632	1.11443	0.05477
PRDM12	ccRCC	606	0.8109	0.74316	0.03019
	non-ccRCC	414	1.6765	1.05959	0.05208
PRDM16	ccRCC	606	5.6089	2.11259	0.08582
	non-ccRCC	414	4.6548	3.61797	0.17781
PRDM1	ccRCC	606	9.1919	1.14823	0.04664
	non-ccRCC	414	6.7733	1.25099	0.06148
SMYD1	ccRCC	606	0.1344	0.30436	0.01236
	non-ccRCC	414	0.0919	0.24277	0.01193
PRDM8	ccRCC	606	4.8828	1.36111	0.05529
	non-ccRCC	414	3.15	1.5796	0.07763
SUV39H1	ccRCC	606	7.5448	0.50005	0.02031
	non-ccRCC	414	7.436	0.53526	0.02631
MECOM	ccRCC	606	9.6296	1.39653	0.05673
	non-ccRCC	414	8.4833	2.71591	0.13348
Independent Samples Test
		Levene's Test for Equality of Variances		t-test for Equality of Means
		F	Sig.	t	df	Sig. (2-tailed)	Mean Difference	Std. Error Difference	95% Confidence Interval of the Difference
									Lower	Upper
WHSC1L1	Equal variances assumed	19.0834	1.37933e-05	10.0544	1018	9.7013e-23	0.315891	0.031418	0.254239	0.377542
	Equal variances not assumed			9.73034	782.201	3.36362e-21	0.315891	0.0324645	0.252163	0.379619
SETD3	Equal variances assumed	5.75651	0.0166067	-4.58765	1018	5.04078e-06	-0.161979	0.0353076	-0.231263	-0.0926949
	Equal variances not assumed			-4.44169	783.592	1.02089e-05	-0.161979	0.0364678	-0.233565	-0.0903926
SETD6	Equal variances assumed	1.58543	0.208269	-8.42978	1018	1.17163e-16	-0.238609	0.0283055	-0.294152	-0.183065
	Equal variances not assumed			-8.50818	915.272	7.14976e-17	-0.238609	0.0280446	-0.293648	-0.183569
SETDB1	Equal variances assumed	3.13402	0.0769737	14.8625	1018	2.2891e-45	0.393492	0.0264755	0.341539	0.445444
	Equal variances not assumed			14.6985	852.286	9.29681e-44	0.393492	0.026771	0.340947	0.446036
SMYD4	Equal variances assumed	8.91404	0.00289755	3.61027	1018	0.000320778	0.124551	0.0344991	0.0568537	0.192249
	Equal variances not assumed			3.52673	812.467	0.000444313	0.124551	0.0353164	0.0552291	0.193873
EZH1	Equal variances assumed	1.89235	0.169239	-7.64532	1018	4.80814e-14	-0.233972	0.0306032	-0.294024	-0.173919
	Equal variances not assumed			-7.57716	859.147	9.13777e-14	-0.233972	0.0308785	-0.294578	-0.173365
SUV420H1	Equal variances assumed	46.694	1.42657e-11	11.1271	1018	3.19718e-27	0.308487	0.0277239	0.254085	0.36289
	Equal variances not assumed			10.4526	689.561	7.72251e-24	0.308487	0.029513	0.250541	0.366433
EHMT1	Equal variances assumed	0.249659	0.617423	-9.75471	1018	1.49455e-21	-0.241387	0.0247457	-0.289945	-0.192828
	Equal variances not assumed			-9.8167	906.624	1.09792e-21	-0.241387	0.0245894	-0.289645	-0.193128
SETD2	Equal variances assumed	0.142157	0.706224	-10.3015	1018	9.68805e-24	-0.353468	0.0343123	-0.420799	-0.286137
	Equal variances not assumed			-10.3254	894.479	1.08735e-23	-0.353468	0.0342328	-0.420654	-0.286282
SUV39H2	Equal variances assumed	14.6776	0.000135359	13.0612	1018	3.70251e-36	0.416158	0.0318622	0.353634	0.478681
	Equal variances not assumed			12.651	784.959	1.61554e-33	0.416158	0.0328953	0.351584	0.480731
PRDM4	Equal variances assumed	90.8927	1.07483e-20	-8.97522	1018	1.33512e-18	-0.321201	0.0357876	-0.391427	-0.250975
	Equal variances not assumed			-8.26053	631.523	8.52557e-16	-0.321201	0.0388839	-0.397559	-0.244844
SETDB2	Equal variances assumed	3.69544	0.0548401	-6.74233	1018	2.60742e-11	-0.243111	0.0360575	-0.313867	-0.172356
	Equal variances not assumed			-6.56308	801.014	9.46149e-11	-0.243111	0.0370423	-0.315823	-0.1704
SETD1B	Equal variances assumed	18.0719	2.32261e-05	-8.67694	1018	1.588e-17	-0.293085	0.0337775	-0.359367	-0.226804
	Equal variances not assumed			-8.45242	803.377	1.33412e-16	-0.293085	0.0346747	-0.361149	-0.225022
EHMT2	Equal variances assumed	48.2194	6.78285e-12	-6.8369	1018	1.39276e-11	-0.231329	0.0338353	-0.297724	-0.164934
	Equal variances not assumed			-6.52355	737.205	1.27545e-10	-0.231329	0.0354605	-0.300944	-0.161713
SETD1A	Equal variances assumed	1.06778	0.301692	-16.5216	1018	1.66828e-54	-0.49532	0.0299802	-0.55415	-0.43649
	Equal variances not assumed			-16.685	916.983	8.78599e-55	-0.49532	0.0296865	-0.553582	-0.437059
SETD4	Equal variances assumed	4.82948	0.0282016	-10.0075	1018	1.49525e-22	-0.373643	0.0373363	-0.446908	-0.300378
	Equal variances not assumed			-9.83026	830.446	1.19866e-21	-0.373643	0.0380095	-0.448249	-0.299037
PRDM2	Equal variances assumed	24.6234	8.16558e-07	7.67529	1018	3.85641e-14	0.26391	0.0343844	0.196438	0.331382
	Equal variances not assumed			7.3183	734.978	6.59584e-13	0.26391	0.0360617	0.193114	0.334706
SETD5	Equal variances assumed	0.112031	0.737913	-0.202325	1018	0.839703	-0.00695349	0.0343678	-0.0743934	0.0604864
	Equal variances not assumed			-0.202512	890.181	0.839563	-0.00695349	0.0343362	-0.0743429	0.0604359
SMYD5	Equal variances assumed	11.1966	0.000849436	-6.51049	1018	1.17418e-10	-0.17229	0.0264635	-0.22422	-0.120361
	Equal variances not assumed			-6.33451	799.53	3.97084e-10	-0.17229	0.0271987	-0.22568	-0.118901
SETMAR	Equal variances assumed	19.2396	1.2729e-05	-12.0764	1018	1.7789e-31	-0.703336	0.0582406	-0.817622	-0.589051
	Equal variances not assumed			-11.5406	742.008	1.87503e-28	-0.703336	0.0609446	-0.822981	-0.583692
SETD8	Equal variances assumed	0.850927	0.356509	-11.0183	1018	9.45114e-27	-0.324923	0.0294893	-0.38279	-0.267056
	Equal variances not assumed			-10.9229	859.98	4.23394e-26	-0.324923	0.0297469	-0.383308	-0.266538
NSD1	Equal variances assumed	10.9021	0.00099392	14.1241	1018	1.69847e-41	0.452201	0.0320162	0.389376	0.515027
	Equal variances not assumed			13.6983	789.15	1.79614e-38	0.452201	0.0330114	0.387401	0.517002
PRDM11	Equal variances assumed	9.78632	0.00180811	-0.666455	1018	0.505271	-0.034332	0.0515143	-0.135418	0.0667544
	Equal variances not assumed			-0.655576	835.013	0.512277	-0.034332	0.0523692	-0.137123	0.0684588
WHSC1	Equal variances assumed	6.91238	0.0086891	-2.82361	1018	0.00484118	-0.0870305	0.0308224	-0.147513	-0.0265478
	Equal variances not assumed			-2.79136	851.035	0.00536629	-0.0870305	0.0311786	-0.148226	-0.0258346
SMYD2	Equal variances assumed	33.013	1.20852e-08	3.81499	1018	0.00014439	0.141485	0.0370865	0.0687099	0.214259
	Equal variances not assumed			3.65567	750.596	0.000274397	0.141485	0.0387028	0.0655061	0.217463
PRDM15	Equal variances assumed	0.945942	0.330985	5.58202	1018	3.04818e-08	0.184366	0.0330285	0.119554	0.249177
	Equal variances not assumed			5.6928	944.356	1.66769e-08	0.184366	0.0323858	0.120809	0.247922
ASH1L	Equal variances assumed	8.59321	0.00344963	12.2046	1018	4.52422e-32	0.531341	0.043536	0.445911	0.616772
	Equal variances not assumed			11.9322	815.189	2.30085e-30	0.531341	0.04453	0.443934	0.618748
SETD7	Equal variances assumed	1.77286	0.183327	18.2068	1018	2.45097e-64	0.793979	0.043609	0.708405	0.879552
	Equal variances not assumed			17.8437	823.086	1.86461e-60	0.793979	0.0444962	0.706639	0.881318
SMYD3	Equal variances assumed	92.8283	4.38249e-21	6.92651	1018	7.6347e-12	0.311413	0.0449596	0.223189	0.399637
	Equal variances not assumed			6.35624	623.624	3.99399e-10	0.311413	0.0489933	0.215201	0.407625
EZH2	Equal variances assumed	7.53611	0.00615392	3.7735	1018	0.000170267	0.253352	0.0671397	0.121604	0.3851
	Equal variances not assumed			3.72481	846.218	0.000208423	0.253352	0.0680173	0.119849	0.386854
PRDM10	Equal variances assumed	18.8593	1.54794e-05	9.82499	1018	7.9181e-22	0.285731	0.0290821	0.228663	0.342799
	Equal variances not assumed			9.45305	763.513	3.93801e-20	0.285731	0.0302263	0.226394	0.345067
SUV420H2	Equal variances assumed	0.000375199	0.98455	-15.5134	1018	6.99224e-49	-0.842263	0.0542926	-0.948802	-0.735725
	Equal variances not assumed			-15.6411	912.153	4.9562e-49	-0.842263	0.0538494	-0.947946	-0.73658
PRDM13	Equal variances assumed	14.8956	0.000120784	-1.82964	1018	0.0675964	-0.0511545	0.0279588	-0.106018	0.00370898
	Equal variances not assumed			-1.63698	560.351	0.102196	-0.0511545	0.0312493	-0.112535	0.0102256
DOT1L	Equal variances assumed	16.4538	5.3658e-05	-8.95411	1018	1.59446e-18	-0.399228	0.044586	-0.486719	-0.311737
	Equal variances not assumed			-9.32717	991.961	6.87782e-20	-0.399228	0.0428027	-0.483222	-0.315233
PRDM7	Equal variances assumed	26.6247	2.96921e-07	-6.59729	1018	6.72073e-11	-0.252829	0.0383231	-0.32803	-0.177627
	Equal variances not assumed			-6.37588	777.788	3.11722e-10	-0.252829	0.0396539	-0.33067	-0.174987
PRDM6	Equal variances assumed	15.4058	9.25498e-05	-1.06186	1018	0.288551	-0.071263	0.0671115	-0.202956	0.0604297
	Equal variances not assumed			-1.10046	982.25	0.2714	-0.071263	0.0647573	-0.198342	0.0558156
PRDM5	Equal variances assumed	105.349	1.37908e-23	7.05057	1018	3.28419e-12	0.517028	0.0733314	0.37313	0.660925
	Equal variances not assumed			6.45201	616.213	2.23443e-10	0.517028	0.0801343	0.359658	0.674397
PRDM14	Equal variances assumed	50.5627	2.17105e-12	-4.34177	1018	1.55456e-05	-0.261046	0.0601242	-0.379027	-0.143064
	Equal variances not assumed			-4.092	699.368	4.77513e-05	-0.261046	0.0637942	-0.386297	-0.135795
PRDM12	Equal variances assumed	77.4229	5.81251e-18	-15.3362	1018	6.47279e-48	-0.86568	0.056447	-0.976445	-0.754914
	Equal variances not assumed			-14.3816	684.459	3.59051e-41	-0.86568	0.0601934	-0.983866	-0.747494
PRDM16	Equal variances assumed	295.494	2.42239e-58	5.30292	1018	1.39772e-07	0.954144	0.179928	0.601072	1.30722
	Equal variances not assumed			4.83258	605.387	1.71028e-06	0.954144	0.19744	0.566393	1.34189
PRDM1	Equal variances assumed	3.12804	0.0772557	31.8479	1018	5.34007e-155	2.41853	0.07594	2.26951	2.56755
	Equal variances not assumed			31.3388	836.132	3.36426e-143	2.41853	0.0771735	2.26705	2.57001
SMYD1	Equal variances assumed	18.0594	2.33765e-05	2.37414	1018	0.0177747	0.0425391	0.0179177	0.00737924	0.077699
	Equal variances not assumed			2.47576	993.866	0.0134611	0.0425391	0.0171823	0.00882143	0.0762568
PRDM8	Equal variances assumed	7.04423	0.00807608	18.6939	1018	2.85592e-67	1.73278	0.0926922	1.55089	1.91467
	Equal variances not assumed			18.1804	798.071	4.59487e-62	1.73278	0.0953103	1.54569	1.91987
SUV39H1	Equal variances assumed	3.8917	0.0487955	3.31704	1018	0.000941931	0.108844	0.0328135	0.0444539	0.173233
	Equal variances not assumed			3.27484	846.809	0.00110013	0.108844	0.0332363	0.0436085	0.174079
MECOM	Equal variances assumed	403.434	7.51864e-76	8.82308	1018	4.76176e-18	1.14628	0.129918	0.891338	1.40121
	Equal variances not assumed			7.90345	563.136	1.43547e-14	1.14628	0.145035	0.8614	1.43115
