# Supplementary material for: Genetic alteration of histone lysine methyltransferases and their significance in renal cell carcinoma
Source: PeerJ. 2019 Feb 6;7:e6396. doi: 10.7717/peerj.6396 (PMC6368835; doi:10.7717/peerj.6396)
Supplement: Supplemental Information 4 — Risk factors, such as age (>65), metastasis, lymph node (>2) and tumor size (longest dimension>1), were analyzed in the multivariate analysis. [file peerj-07-6396-s004.xlsx]

## Sheet: Sheet1
Table S2:Summary of multivariate analysis of overall survival for 10 HMT CNAs in renal cell carcinoma
		Age	Metastasis	Lymph Node	Tumor Size	ASH1L GAIN/AMP
B		-0.846854	-1.13967	-0.721699	-0.845716	-0.559945
P-value		2.95112e-07	2.79491e-09	0.0225478	4.59664e-06	0.00743809
Hazard Ratio		0.428762	0.319925	0.485926	0.42925	0.57124
95.0% CI	Low	0.310174	0.219696	0.26137	0.298961	0.379092
	High	0.592688	0.46588	0.903411	0.616319	0.860781
		Age	Metastasis	Lymph Node	Tumor Size	DOT1L GAIN/AMP
B		-0.870592	-1.13714	-0.678235	-0.865733	0.670492
P-value		1.18701e-07	2.62981e-09	0.0326379	2.95202e-06	0.0227857
Hazard Ratio		0.418704	0.320735	0.507512	0.420743	1.9552
95.0% CI	Low	0.303366	0.220574	0.272416	0.292657	1.09785
	High	0.577892	0.466377	0.945497	0.604888	3.48207
		Age	Metastasis	Lymph Node	Tumor Size	EHMT1 Loss
B		-0.884215	-1.10825	-0.802263	-0.854863	0.109703
P-value		1.72259e-07	1.57374e-08	0.0123081	5.33867e-06	0.537207
Hazard Ratio		0.413038	0.330136	0.448313	0.425341	1.11595
95.0% CI	Low	0.296483	0.224816	0.239207	0.294339	0.787607
	High	0.575415	0.484795	0.840212	0.614649	1.58117
		Age	Metastasis	Lymph Node	Tumor Size	EHMT2 Loss
B		-0.876868	-1.08983	-0.807363	-0.840356	0.157989
P-value		1.26342e-07	1.34719e-08	0.0114972	6.21643e-06	0.435045
Hazard Ratio		0.416084	0.336273	0.446033	0.431557	1.17115
95.0% CI	Low	0.300558	0.230871	0.238471	0.29974	0.787649
	High	0.576015	0.489795	0.834254	0.621344	1.74138
		Age	Metastasis	Lymph Node	Tumor Size	EZH1 Amp/Gain
B		-0.852144	-1.09978	-0.76175	-0.835706	-0.223076
P-value		2.72989e-07	1.31921e-08	0.0158115	6.88421e-06	0.524406
Hazard Ratio		0.426499	0.332944	0.466849	0.433568	0.800054
95.0% CI	Low	0.308201	0.227856	0.251473	0.301219	0.402558
	High	0.590206	0.486497	0.866686	0.62407	1.59005
		Age	Metastasis	Lymph Node	Tumor Size	EZH2 Amp/Gain
B		-0.865958	-1.09804	-0.75971	-0.841154	0.165697
P-value		1.46875e-07	1.03753e-08	0.0163017	5.87432e-06	0.322978
Hazard Ratio		0.420649	0.333524	0.467802	0.431213	1.18022
95.0% CI	Low	0.304572	0.22901	0.251682	0.299686	0.849685
	High	0.580963	0.485736	0.869505	0.620464	1.63932
		Age	Metastasis	Lymph Node	Tumor Size	KMT2A Amp/Gain
B		-0.840761	-1.0896	-0.737342	-0.850517	0.294811
P-value		4.0982e-07	1.20435e-08	0.0200955	4.84111e-06	0.400599
Hazard Ratio		0.431382	0.33635	0.478384	0.427194	1.34287
95.0% CI	Low	0.311565	0.231234	0.256908	0.296663	0.675288
	High	0.597276	0.48925	0.890788	0.615159	2.67043
		Age	Metastasis	Lymph Node	Tumor Size	KMT2C Amp/Gain
B		-0.865783	-1.09826	-0.759382	-0.84095	0.168516
P-value		1.47638e-07	1.02832e-08	0.0163532	5.89646e-06	0.314596
Hazard Ratio		0.420722	0.333451	0.467956	0.431301	1.18355
95.0% CI	Low	0.304628	0.228965	0.251757	0.299754	0.85221
	High	0.581061	0.485618	0.869816	0.620576	1.64371
		Age	Metastasis	Lymph Node	Tumor Size	KMT2D Amp/Gain
B		-0.85912	-1.09044	-0.787342	-0.796223	-0.254698
P-value		1.78292e-07	1.08641e-08	0.0124181	2.15273e-05	0.144881
Hazard Ratio		0.423535	0.336068	0.455053	0.451029	0.77515
95.0% CI	Low	0.306771	0.23124	0.245466	0.312375	0.550395
	High	0.584742	0.488419	0.843593	0.651228	1.09168
		Age	Metastasis	Lymph Node	Tumor Size	KMT2E Amp/Gain
B		-0.866034	-1.09451	-0.762539	-0.838062	0.115442
P-value		1.48594e-07	1.18438e-08	0.0158375	6.35859e-06	0.487976
Hazard Ratio		0.420617	0.334704	0.466481	0.432548	1.12237
95.0% CI	Low	0.3045	0.229758	0.251075	0.300611	0.809932
	High	0.581012	0.487587	0.866691	0.622391	1.55533
		Age	Metastasis	Lymph Node	Tumor Size	MECOM Amp/Gain
B		-0.879708	-1.11258	-0.793326	-0.875408	0.321746
P-value		9.57722e-08	7.89272e-09	0.0116908	3.18266e-06	0.115623
Hazard Ratio		0.414904	0.328711	0.452338	0.416692	1.37953
95.0% CI	Low	0.300316	0.225271	0.244139	0.288314	0.923998
	High	0.573214	0.479648	0.838086	0.602233	2.05966
		Age	Metastasis	Lymph Node	Tumor Size	MECOM Loss
B		-0.860907	-1.08398	-0.760836	-0.838816	-0.0216149
P-value		1.77021e-07	1.54848e-08	0.0180558	6.67252e-06	0.928208
Hazard Ratio		0.422778	0.338247	0.467276	0.432222	0.978617
95.0% CI	Low	0.306042	0.232328	0.2487	0.300038	0.611517
	High	0.584042	0.492452	0.877953	0.62264	1.56609
		Age	Metastasis	Lymph Node	Tumor Size	NSD1 Amp/Gain
B		-0.845803	-1.09163	-0.785295	-0.853652	0.450966
P-value		2.77729e-07	1.31272e-08	0.0123304	5.65503e-06	0.00453599
Hazard Ratio		0.429213	0.335668	0.455985	0.425857	1.56983
95.0% CI	Low	0.310849	0.23038	0.246516	0.29456	1.14976
	High	0.592647	0.489074	0.843444	0.615678	2.14337
		Age	Metastasis	Lymph Node	Tumor Size	PRDM1 Loss
B		-0.877117	-1.10264	-0.829547	-0.840737	0.337833
P-value		1.07108e-07	8.81523e-09	0.00905081	5.90511e-06	0.0692425
Hazard Ratio		0.415981	0.331995	0.436247	0.431392	1.40191
95.0% CI	Low	0.301011	0.228014	0.233994	0.299838	0.973737
	High	0.574863	0.483394	0.813317	0.620666	2.01835
		Age	Metastasis	Lymph Node	Tumor Size	PRDM2 Loss
B		-0.815679	-1.0646	-0.770399	-0.853342	-0.307956
P-value		1.02254e-06	2.64422e-08	0.0139378	4.66972e-06	0.0909338
Hazard Ratio		0.442339	0.344867	0.462829	0.425989	0.734948
95.0% CI	Low	0.318926	0.237013	0.250453	0.295646	0.514273
	High	0.613508	0.501802	0.855292	0.613797	1.05031
		Age	Metastasis	Lymph Node	Tumor Size	PRDM4 Amp/Gain
B		-0.856812	-1.08334	-0.754572	-0.810042	-0.205771
P-value		1.97631e-07	1.43428e-08	0.0165618	1.44622e-05	0.238702
Hazard Ratio		0.424513	0.338462	0.470212	0.444839	0.81402
95.0% CI	Low	0.307383	0.23273	0.253663	0.308468	0.578068
	High	0.586277	0.492229	0.871624	0.641499	1.14628
		Age	Metastasis	Lymph Node	Tumor Size	PRDM5 Loss
B		-0.827603	-1.06043	-0.831792	-0.790698	-0.307311
P-value		6.12278e-07	2.82833e-08	0.0089114	2.64274e-05	0.106193
Hazard Ratio		0.437096	0.346306	0.435269	0.453528	0.735422
95.0% CI	Low	0.315738	0.238163	0.233372	0.313648	0.506547
	High	0.605099	0.503556	0.811833	0.655793	1.06771
		Age	Metastasis	Lymph Node	Tumor Size	PRDM6 Amp/Gain
B		-0.854628	-1.06417	-0.749963	-0.843583	0.245755
P-value		2.01844e-07	3.0391e-08	0.0176328	6.04937e-06	0.117775
Hazard Ratio		0.425441	0.345015	0.472384	0.430167	1.27859
95.0% CI	Low	0.308233	0.23676	0.254278	0.298495	0.939711
	High	0.587219	0.502768	0.87757	0.61992	1.73966
		Age	Metastasis	Lymph Node	Tumor Size	PRDM7 Amp/Gain
B		-0.873502	-1.11559	-0.647275	-0.887753	0.506216
P-value		1.14988e-07	4.76042e-09	0.04214	1.75956e-06	0.0187813
Hazard Ratio		0.417487	0.327722	0.52347	0.41158	1.659
95.0% CI	Low	0.302266	0.225595	0.280393	0.285984	1.08762
	High	0.576629	0.476081	0.977274	0.592333	2.53056
		Age	Metastasis	Lymph Node	Tumor Size	PRDM8 Loss
B		-0.80612	-1.03357	-0.840256	-0.794228	-0.397881
P-value		1.4175e-06	7.36572e-08	0.00810286	2.19473e-05	0.0467168
Hazard Ratio		0.446587	0.355734	0.4316	0.45193	0.671742
95.0% CI	Low	0.321827	0.244152	0.231716	0.31317	0.453853
	High	0.619714	0.518313	0.80391	0.652173	0.994236
		Age	Metastasis	Lymph Node	Tumor Size	PRDM9 Amp/Gain
B		-0.880485	-1.09591	-0.792786	-0.848913	0.376416
P-value		9.12112e-08	1.19522e-08	0.0122137	5.52318e-06	0.0261367
Hazard Ratio		0.414582	0.334236	0.452582	0.42788	1.45705
95.0% CI	Low	0.300158	0.229303	0.243448	0.296685	1.04573
	High	0.572625	0.487189	0.841374	0.61709	2.03017
		Age	Metastasis	Lymph Node	Tumor Size	PRDM10 Amp/Gain
B		-0.8305	-1.09498	-0.720701	-0.858718	0.517951
P-value		5.27108e-07	9.78089e-09	0.0230205	3.8399e-06	0.187981
Hazard Ratio		0.435831	0.334545	0.486411	0.423705	1.67858
95.0% CI	Low	0.315057	0.230102	0.261291	0.294338	0.77638
	High	0.602903	0.486395	0.905489	0.609931	3.62921
		Age	Metastasis	Lymph Node	Tumor Size	PRDM11 Amp/Gain
B		-0.856837	-1.08526	-0.759113	-0.8413	0.0694759
P-value		2.44129e-07	1.47162e-08	0.0167438	6.41744e-06	0.828538
Hazard Ratio		0.424503	0.337815	0.468081	0.43115	1.07195
95.0% CI	Low	0.306615	0.232064	0.251316	0.299171	0.571631
	High	0.587715	0.491756	0.87181	0.62135	2.01016
		Age	Metastasis	Lymph Node	Tumor Size	PRDM12 Loss
B		-0.871543	-1.09291	-0.779004	-0.845672	0.0450536
P-value		2.79099e-07	2.14225e-08	0.0146546	7.18712e-06	0.799058
Hazard Ratio		0.418306	0.335238	0.458863	0.429269	1.04608
95.0% CI	Low	0.299972	0.228683	0.245479	0.296716	0.739468
	High	0.583321	0.491443	0.857732	0.621038	1.47984
		Age	Metastasis	Lymph Node	Tumor Size	PRDM13 Loss
B		-0.877549	-1.10386	-0.828816	-0.839445	0.332174
P-value		1.05847e-07	8.51187e-09	0.00911793	6.09466e-06	0.0740779
Hazard Ratio		0.415801	0.331588	0.436566	0.43195	1.394
95.0% CI	Low	0.300872	0.227728	0.234152	0.300233	0.968189
	High	0.574631	0.482817	0.813956	0.621455	2.00707
		Age	Metastasis	Lymph Node	Tumor Size	PRDM14 Loss
B		-0.867946	-1.07263	-0.816272	-0.857713	0.32216
P-value		1.38879e-07	2.08711e-08	0.00977087	4.02424e-06	0.19332
Hazard Ratio		0.419813	0.342106	0.442077	0.424131	1.3801
95.0% CI	Low	0.303934	0.235101	0.238007	0.294533	0.849385
	High	0.579872	0.497814	0.821117	0.610753	2.24243
		Age	Metastasis	Lymph Node	Tumor Size	PRDM14 Amp/Gain
B		-0.857355	-1.07895	-0.775505	-0.833907	-0.0882396
P-value		2.07839e-07	1.88606e-08	0.0142309	7.47143e-06	0.695474
Hazard Ratio		0.424283	0.339953	0.460471	0.434349	0.915541
95.0% CI	Low	0.306974	0.23338	0.247697	0.301571	0.588568
	High	0.586421	0.495192	0.85602	0.625588	1.42416
		Age	Metastasis	Lymph Node	Tumor Size	PRDM15 Loss
B		-0.860114	-1.0904	-0.772619	-0.830683	-0.125067
P-value		1.78694e-07	1.34719e-08	0.0144272	8.3462e-06	0.611376
Hazard Ratio		0.423114	0.336082	0.461802	0.435751	0.882438
95.0% CI	Low	0.306344	0.230694	0.248677	0.302387	0.544714
	High	0.584394	0.489613	0.857583	0.627936	1.42955
		Age	Metastasis	Lymph Node	Tumor Size	PRDM16 Loss
B		-0.819878	-1.04637	-0.782145	-0.860253	-0.328146
P-value		8.01494e-07	4.70277e-08	0.0124682	3.77442e-06	0.0653817
Hazard Ratio		0.440485	0.35121	0.457424	0.423055	0.720258
95.0% CI	Low	0.318066	0.241271	0.247665	0.293778	0.508045
	High	0.610023	0.511244	0.844836	0.609221	1.02111
		Age	Metastasis	Lymph Node	Tumor Size	SETD1A Amp/Gain
B		-0.867087	-1.10976	-0.645752	-0.887847	0.483489
P-value		1.41478e-07	5.90414e-09	0.0427436	1.83454e-06	0.0208952
Hazard Ratio		0.420174	0.329638	0.524268	0.411541	1.62172
95.0% CI	Low	0.304229	0.226837	0.280721	0.285763	1.07599
	High	0.580306	0.479027	0.97911	0.59268	2.44425
		Age	Metastasis	Lymph Node	Tumor Size	SETD1B AMP/Gain
B		-0.856812	-1.08334	-0.754572	-0.810042	-0.205771
P-value		1.97631e-07	1.43428e-08	0.0165618	1.44622e-05	0.238702
Hazard Ratio		0.424513	0.338462	0.470212	0.444839	0.81402
95.0% CI	Low	0.307383	0.23273	0.253663	0.308468	0.578068
	High	0.586277	0.492229	0.871624	0.641499	1.14628
		Age	Metastasis	Lymph Node	Tumor Size	SETD2 Loss
B		-0.856986	-1.08107	-0.770811	-0.841072	0.0888507
P-value		2.14215e-07	1.74038e-08	0.014672	6.30559e-06	0.731924
Hazard Ratio		0.42444	0.339234	0.462638	0.431248	1.09292
95.0% CI	Low	0.307022	0.232931	0.249105	0.299359	0.657376
	High	0.586761	0.494051	0.85921	0.621243	1.81703
		Age	Metastasis	Lymph Node	Tumor Size	SETD3 Loss
B		-0.852764	-1.07274	-0.708358	-0.818017	-0.152462
P-value		2.42575e-07	1.93148e-08	0.0273674	1.10647e-05	0.352391
Hazard Ratio		0.426235	0.34207	0.492452	0.441306	0.858592
95.0% CI	Low	0.308367	0.235278	0.262463	0.306422	0.62264
	High	0.589158	0.497334	0.923974	0.635566	1.18396
		Age	Metastasis	Lymph Node	Tumor Size	SETD4 Loss
B		-0.86023	-1.09191	-0.769347	-0.830378	-0.114929
P-value		1.77843e-07	1.39667e-08	0.0148155	8.56951e-06	0.657649
Hazard Ratio		0.423065	0.335573	0.463315	0.435884	0.89143
95.0% CI	Low	0.306312	0.230131	0.249541	0.302379	0.536214
	High	0.58432	0.489328	0.860225	0.628335	1.48196
		Age	Metastasis	Lymph Node	Tumor Size	SETD5 Loss
B		-0.858884	-1.08107	-0.770997	-0.838576	0.0682794
P-value		1.93241e-07	1.76574e-08	0.0147075	6.50102e-06	0.782853
Hazard Ratio		0.423635	0.339231	0.462551	0.432326	1.07066
95.0% CI	Low	0.306587	0.23289	0.248966	0.300276	0.658828
	High	0.585369	0.494131	0.859369	0.622446	1.73994
		Age	Metastasis	Lymph Node	Tumor Size	SETD6 Amp/Gain
B		-0.872814	-1.11295	-0.656665	-0.883964	0.459119
P-value		1.17776e-07	5.29102e-09	0.0393146	1.97548e-06	0.0307241
Hazard Ratio		0.417774	0.328587	0.518578	0.413142	1.58268
95.0% CI	Low	0.30247	0.226137	0.277711	0.287005	1.04356
	High	0.577033	0.477453	0.968357	0.594715	2.40031
		Age	Metastasis	Lymph Node	Tumor Size	SETD7 Loss
B		-0.821707	-1.05671	-0.842	-0.782356	-0.351453
P-value		7.40974e-07	3.0774e-08	0.00810691	3.24802e-05	0.0631614
Hazard Ratio		0.439681	0.347599	0.430848	0.457327	0.703665
95.0% CI	Low	0.317574	0.239128	0.231004	0.316202	0.485691
	High	0.608736	0.505273	0.803578	0.661438	1.01946
		Age	Metastasis	Lymph Node	Tumor Size	SETD8 Amp/Gain
B		-0.856812	-1.08334	-0.754572	-0.810042	-0.205771
P-value		1.97631e-07	1.43428e-08	0.0165618	1.44622e-05	0.238702
Hazard Ratio		0.424513	0.338462	0.470212	0.444839	0.81402
95.0% CI	Low	0.307383	0.23273	0.253663	0.308468	0.578068
	High	0.586277	0.492229	0.871624	0.641499	1.14628
		Age	Metastasis	Lymph Node	Tumor Size	SETDB1 Amp/Gain
B		-0.842896	-1.14547	-0.713494	-0.846474	-0.553549
P-value		3.41072e-07	2.5354e-09	0.0243963	4.44767e-06	0.00935001
Hazard Ratio		0.430462	0.318075	0.489929	0.428924	0.574906
95.0% CI	Low	0.311338	0.218229	0.263215	0.2988	0.378706
	High	0.595166	0.463605	0.911921	0.615717	0.872753
		Age	Metastasis	Lymph Node	Tumor Size	SETDB2 Loss
B		-0.863826	-1.11237	-0.712332	-0.788147	-0.449994
P-value		1.497e-07	6.30015e-09	0.0232746	2.66019e-05	0.0201943
Hazard Ratio		0.421546	0.328778	0.490499	0.454687	0.637632
95.0% CI	Low	0.305399	0.225889	0.265093	0.314782	0.436176
	High	0.581865	0.478533	0.907564	0.656772	0.932134
		Age	Metastasis	Lymph Node	Tumor Size	SETMAR Loss
B		-0.856316	-1.079	-0.773318	-0.839924	0.0944937
P-value		2.18076e-07	1.95017e-08	0.0144205	6.38842e-06	0.685957
Hazard Ratio		0.424724	0.339937	0.461479	0.431743	1.0991
95.0% CI	Low	0.307242	0.233275	0.248375	0.299786	0.695213
	High	0.587128	0.495368	0.857427	0.621786	1.73764
		Age	Metastasis	Lymph Node	Tumor Size	SMYD1 Amp/Gain
B		-0.865779	-1.07901	-0.757889	-0.84437	0.112254
P-value		1.538e-07	1.82018e-08	0.0165048	5.73602e-06	0.621435
Hazard Ratio		0.420723	0.339932	0.468655	0.429828	1.1188
95.0% CI	Low	0.304488	0.233457	0.252221	0.298429	0.716568
	High	0.581331	0.494969	0.870814	0.619082	1.74681
		Age	Metastasis	Lymph Node	Tumor Size	SMYD2 Amp/Gain
B		-0.854895	-1.08835	-0.781444	-0.841867	-0.266558
P-value		2.11372e-07	1.09572e-08	0.0132205	5.37264e-06	0.222661
Hazard Ratio		0.425328	0.336772	0.457744	0.430905	0.766012
95.0% CI	Low	0.307956	0.231869	0.2467	0.299831	0.499089
	High	0.587434	0.489138	0.84933	0.61928	1.17569
		Age	Metastasis	Lymph Node	Tumor Size	SMYD2 Loss
B		-0.862299	-1.08409	-0.765447	-0.837868	0.0119648
P-value		2.07874e-07	1.60289e-08	0.0155414	6.52651e-06	0.96528
Hazard Ratio		0.42219	0.338208	0.465126	0.432632	1.01204
95.0% CI	Low	0.30489	0.232201	0.250196	0.300561	0.590504
	High	0.58462	0.49261	0.86469	0.622737	1.73448
		Age	Metastasis	Lymph Node	Tumor Size	SMYD3 Amp/Gain
B		-0.855172	-1.08741	-0.778899	-0.840475	-0.230537
P-value		2.1112e-07	1.15813e-08	0.0135362	5.62654e-06	0.299567
Hazard Ratio		0.42521	0.337089	0.458911	0.431506	0.794107
95.0% CI	Low	0.307843	0.232018	0.247307	0.300196	0.513704
	High	0.587325	0.489741	0.851571	0.620252	1.22757
		Age	Metastasis	Lymph Node	Tumor Size	SMYD3 Loss
B		-0.87217	-1.08593	-0.755357	-0.842417	0.127227
P-value		1.55411e-07	1.42834e-08	0.0169564	5.88927e-06	0.644135
Hazard Ratio		0.418043	0.337589	0.469843	0.430668	1.13567
95.0% CI	Low	0.301791	0.231934	0.252736	0.299131	0.661926
	High	0.579077	0.491375	0.873451	0.620047	1.94849
		Age	Metastasis	Lymph Node	Tumor Size	SMYD4 Loss
B		-0.86323	-1.08751	-0.760841	-0.83769	0.0433066
P-value		1.71661e-07	1.7403e-08	0.016501	6.53101e-06	0.868434
Hazard Ratio		0.421797	0.337053	0.467273	0.432709	1.04426
95.0% CI	Low	0.305174	0.230915	0.250876	0.300634	0.625563
	High	0.582989	0.491977	0.870326	0.622807	1.74319
		Age	Metastasis	Lymph Node	Tumor Size	SMYD5 Amp/Gain
B		-0.867722	-1.07756	-0.754305	-0.846224	0.164425
P-value		1.43875e-07	1.87668e-08	0.0170261	5.36682e-06	0.477395
Hazard Ratio		0.419907	0.340426	0.470338	0.429032	1.17871
95.0% CI	Low	0.303906	0.233832	0.253121	0.297973	0.748898
	High	0.580185	0.495612	0.873958	0.617735	1.85522
		Age	Metastasis	Lymph Node	Tumor Size	SUV39H1 Loss
B		-0.851568	-1.07413	-0.785122	-0.832817	-0.29698
P-value		2.38983e-07	2.23638e-08	0.0129852	7.82492e-06	0.227911
Hazard Ratio		0.426745	0.341596	0.456064	0.434823	0.743059
95.0% CI	Low	0.30893	0.23444	0.245473	0.3018	0.458534
	High	0.589492	0.497732	0.84732	0.626476	1.20414
		Age	Metastasis	Lymph Node	Tumor Size	SUV39H2 Loss
B		-0.870973	-1.08374	-0.752198	-0.847706	0.107181
P-value		1.60957e-07	1.56317e-08	0.017645	5.82322e-06	0.655238
Hazard Ratio		0.418544	0.338328	0.471329	0.428397	1.11314
95.0% CI	Low	0.302166	0.232379	0.253225	0.29693	0.695375
	High	0.579744	0.492583	0.877287	0.61807	1.78187
		Age	Metastasis	Lymph Node	Tumor Size	SUV420H1 Amp/Gain
B		-0.844975	-1.09148	-0.740158	-0.848582	0.281017
P-value		3.34087e-07	1.15593e-08	0.0195632	5.02357e-06	0.422402
Hazard Ratio		0.429568	0.335718	0.477038	0.428021	1.32448
95.0% CI	Low	0.31052	0.230757	0.256267	0.2973	0.666629
	High	0.594256	0.488423	0.888003	0.61622	2.6315
		Age	Metastasis	Lymph Node	Tumor Size	SUV420H2 Amp/Gain
B		-0.866456	-1.11038	-0.719832	-0.85228	0.253541
P-value		1.41677e-07	8.61054e-09	0.0237608	4.81561e-06	0.290716
Hazard Ratio		0.420439	0.329432	0.486834	0.426442	1.28858
95.0% CI	Low	0.304488	0.225716	0.260845	0.295943	0.805097
	High	0.580545	0.480805	0.908615	0.614485	2.06241
		Age	Metastasis	Lymph Node	Tumor Size	WHSC1 Loss
B		-0.802083	-1.06011	-0.824126	-0.796628	-0.345722
P-value		1.98628e-06	2.74069e-08	0.00936627	2.07042e-05	0.0830678
Hazard Ratio		0.448394	0.346419	0.438618	0.450847	0.707709
95.0% CI	Low	0.32216	0.238356	0.235566	0.312426	0.478698
	High	0.624091	0.503475	0.816697	0.650596	1.04628
		Age	Metastasis	Lymph Node	Tumor Size	WHSC1L1 Loss
B		-0.863628	-1.08219	-0.769369	-0.842245	0.0544891
P-value		1.63777e-07	1.67751e-08	0.0147599	6.33694e-06	0.76106
Hazard Ratio		0.42163	0.338852	0.463305	0.430742	1.056
95.0% CI	Low	0.305171	0.232675	0.249617	0.29883	0.743258
	High	0.582531	0.493479	0.859924	0.620883	1.50034
